# Supplementary material for: 2,3-Diphosphoglycerate and the Protective Effect of Pyruvate Kinase Deficiency against Malaria Infection—Exploring the Role of the Red Blood Cell Membrane
Source: MDPI journal article supplement (doi:10.3390/ijms24021336), 2023-01-10
Supplement: s1 [file s1]

**Table S1** - RBC stiffness (Young's modulus) measured by AFM force spectroscopy of infected and non-infected RBCs after 30 h of incubation with or without 2,3-DPG 8 mM. Results from statistical analysis by comparison between the studied groups.

| Dunn's Multiple Comparison Test                   | Mean rank diff.        | Significant P < 0.05? | Summary               | Adjusted P value  |
|---------------------------------------------------|------------------------|-----------------------|-----------------------|-------------------|
| niRBC untreated vs iRBC untreated                 | -567.5                 | Yes                   | ***                   | <0.0001           |
| niRBC untreated vs iRBC + DPG                     | -409.9                 | Yes                   | ***                   | <0.0001           |
| niRBC untreated vs niRBC + DPG                    | -285.6                 | Yes                   | ***                   | <0.0001           |
| iRBC untreated vs iRBC + DPG                      | 157.7                  | Yes                   | *                     | 0.0425            |
| iRBC untreated vs niRBC + DPG                     | 282.0                  | Yes                   | ***                   | <0.0001           |
| iRBC + DPG vs niRBC + DPG                         | 124.3                  | No                    | ns                    | -                 |
| <b>Kruskal-Wallis test Descriptive statistics</b> | <b>niRBC untreated</b> | <b>niRBC + DPG</b>    | <b>iRBC untreated</b> | <b>iRBC + DPG</b> |
| Median                                            | 2.1872                 | 3.78086               | 5.2657                | 4.21844           |
| Mean                                              | 3.3285                 | 4.7232                | 5.64284               | 5.11759           |
| Std. Deviation                                    | 3.39957                | 3.89117               | 3.84977               | 4.36006           |
| Std. Error of Mean                                | 0.0974894              | 0.150217              | 0.172512              | 0.191755          |

Data from three independent experiments. iRBC + DPG – infected RBCs treated with 2,3-DPG (n=1573); iRBC untreated – untreated infected RBCs (n=1126); niRBC + DPG – non-infected RBCs treated with 2,3-DPG (n=1358); niRBC untreated – untreated non-infected RBCs (n=1273).

**Table S2** - RBC indentation depth measured by AFM force spectroscopy of infected and non-infected RBCs after 30 h of incubation with or without 2,3-DPG 8 mM. Results from statistical analysis by comparison between the studied groups.

| Dunn's Multiple Comparison Test                   | Mean rank diff.        | Significant P < 0.05? | Summary               | Adjusted P value  |
|---------------------------------------------------|------------------------|-----------------------|-----------------------|-------------------|
| niRBC untreated vs iRBC untreated                 | -401.0                 | Yes                   | ****                  | <0.0001           |
| niRBC untreated vs iRBC + DPG                     | -281.6                 | Yes                   | ****                  | <0.0001           |
| niRBC untreated vs niRBC + DPG                    | 736.2                  | Yes                   | ****                  | <0.0001           |
| iRBC untreated vs iRBC + DPG                      | 119.4                  | No                    | ns                    | 0.3224            |
| iRBC untreated vs niRBC + DPG                     | -1137                  | Yes                   | ****                  | <0.0001           |
| iRBC + DPG vs niRBC + DPG                         | -1018                  | Yes                   | ****                  | -                 |
| <b>Kruskal-Wallis test Descriptive statistics</b> | <b>niRBC untreated</b> | <b>niRBC + DPG</b>    | <b>iRBC untreated</b> | <b>iRBC + DPG</b> |
| Median                                            | 369.6                  | 436.5                 | 323.3                 | 337.4             |
| Mean                                              | 338.0                  | 409.6                 | 318.2                 | 319.6             |
| Std. Deviation                                    | 174.6                  | 167.0                 | 124.7                 | 149.6             |
| Std. Error of Mean                                | 4.739                  | 4.407                 | 3.715                 | 3.772             |

Data from three independent experiments. iRBC + DPG – infected RBCs treated with 2,3-DPG (n=1573); iRBC untreated – untreated infected RBCs (n=1126); niRBC + DPG – non-infected RBCs treated with 2,3-DPG (n=1436); niRBC untreated – untreated non-infected RBCs (n=1358).

**Table S3** - AFM imaging results - RBC height of infected cultures and uninfected RBCs after 30 h incubation with or without 2,3-DPG 8 mM. Results from statistical analysis by comparison between the studied groups.

| Dunn's Multiple Comparison Test                   | Mean rank diff.        | Significant P < 0.05? | Summary               | Adjusted P value  |
|---------------------------------------------------|------------------------|-----------------------|-----------------------|-------------------|
| niRBC untreated vs iRBC untreated                 | 2.3                    | No                    | ns                    | >0.99             |
| niRBC untreated vs iRBC + DPG                     | -202                   | Yes                   | ****                  | <0.0001           |
| niRBC untreated vs niRBC + DPG                    | 317                    | Yes                   | ****                  | <0.0001           |
| iRBC untreated vs iRBC + DPG                      | -204                   | Yes                   | ****                  | <0.0001           |
| iRBC untreated vs niRBC + DPG                     | -315                   | Yes                   | ****                  | <0.0001           |
| iRBC + DPG vs niRBC + DPG                         | -519                   | Yes                   | ****                  | <0.0001           |
| <b>Kruskal-Wallis test Descriptive statistics</b> | <b>niRBC untreated</b> | <b>niRBC + DPG</b>    | <b>iRBC untreated</b> | <b>iRBC + DPG</b> |
| Median                                            | 439                    | 466                   | 450                   | 421               |
| Mean                                              | 447                    | 476                   | 422                   | 376               |
| Std. Deviation                                    | 43                     | 63                    | 94                    | 140               |
| Std. Error of Mean                                | 1.6                    | 3.1                   | 3.5                   | 5.1               |

Data from three independent experiments. iRBC + DPG – cultures with infected RBCs treated with 2,3-DPG (n=7650); iRBC untreated – cultures with infected RBCs untreated (n=741); niRBC + DPG – non-infected RBCs treated with 2,3-DPG (n=41032); niRBC untreated – untreated non-infected RBCs (n=718).

**Table S4** - AFM imaging results - RBC area of infected cultures and uninfected RBCs after 30 h incubation with or without 2,3-DPG 8 mM. Results from statistical analysis by comparison between the studied groups.

| Dunn's Multiple Comparison Test                   | Mean rank diff.        | Significant P < 0.05? | Summary               | Adjusted P value  |
|---------------------------------------------------|------------------------|-----------------------|-----------------------|-------------------|
| niRBC untreated vs iRBC untreated                 | -483                   | Yes                   | ****                  | <0.0001           |
| niRBC untreated vs iRBC + DPG                     | -238                   | Yes                   | ****                  | <0.0001           |
| niRBC untreated vs niRBC + DPG                    | -230                   | Yes                   | ****                  | <0.0001           |
| iRBC untreated vs iRBC + DPG                      | 45                     | No                    | ns                    | >0.9999           |
| iRBC untreated vs niRBC + DPG                     | -253                   | Yes                   | ****                  | <0.0001           |
| iRBC + DPG vs niRBC + DPG                         | -208                   | Yes                   | ****                  | <0.0001           |
| <b>Kruskal-Wallis test Descriptive statistics</b> | <b>niRBC untreated</b> | <b>niRBC + DPG</b>    | <b>iRBC untreated</b> | <b>iRBC + DPG</b> |
| Median                                            | 47                     | 46                    | 43                    | 44                |
| Mean                                              | 47                     | 45                    | 43                    | 43                |
| Std. Deviation                                    | 5.9                    | 7.8                   | 6.6                   | 7.7               |
| Std. Error of Mean                                | 0.21                   | 0.38                  | 0.24                  | 0.28              |

Data from three independent experiments. iRBC + DPG – cultures with infected RBCs treated with 2,3-DPG (n=771); iRBC untreated – cultures with infected RBCs untreated (n=734); niRBC + DPG – non-infected RBCs treated with 2,3-DPG (n=429); niRBC untreated – untreated non-infected RBCs (n=783).

**Table S5** - AFM imaging results - RBC volume of infected cultures and uninfected RBCs after 30 h incubation with or without 2,3-DPG 8 mM. Results from statistical analysis by comparison between the studied groups.

| Dunn's Multiple Comparison Test                   | Mean rank diff.        | Significant P < 0.05? | Summary               | Adjusted P value  |
|---------------------------------------------------|------------------------|-----------------------|-----------------------|-------------------|
| niRBC untreated vs iRBC untreated                 | -679                   | Yes                   | ****                  | <0.0001           |
| niRBC untreated vs iRBC + DPG                     | -794                   | Yes                   | ****                  | <0.0001           |
| niRBC untreated vs niRBC + DPG                    | 27                     | No                    | ns                    | >0.9999           |
| iRBC untreated vs iRBC + DPG                      | -116                   | Yes                   | *                     | 0.0277            |
| iRBC untreated vs niRBC + DPG                     | -706                   | Yes                   | ****                  | <0.0001           |
| iRBC + DPG vs niRBC + DPG                         | -822                   | Yes                   | ****                  | <0.0001           |
| <b>Kruskal-Wallis test Descriptive statistics</b> | <b>niRBC untreated</b> | <b>niRBC + DPG</b>    | <b>iRBC untreated</b> | <b>iRBC + DPG</b> |
| Median                                            | 4.5                    | 4.5                   | 2.6                   | 2.1               |
| Mean                                              | 4.6                    | 4.6                   | 2.7                   | 2.6               |
| Std. Deviation                                    | 2.1                    | 2.1                   | 1.3                   | 1.7               |
| Std. Error of Mean                                | 0.075                  | 0.099                 | 0.049                 | 0.062             |

Data from three independent experiments. iRBC + DPG – cultures with infected RBCs treated with 2,3-DPG (n=73966); iRBC untreated – cultures with infected RBCs untreated (n=741); niRBC + DPG – non-infected RBCs treated with 2,3-DPG (n=432); niRBC untreated – untreated non-infected RBCs (n=812).

**Table S6** - Zeta potential of infected cultures and non-infected RBCs, untreated or treated with 2,3-DPG for 30 h. Results from statistical analysis by comparison between the studied groups.

| Dunn's Multiple Comparison Test                   | Mean rank diff.        | Significant P < 0.05? | Summary               | Adjusted P value  |
|---------------------------------------------------|------------------------|-----------------------|-----------------------|-------------------|
| niRBC untreated vs iRBC untreated                 | -38.41                 | No                    | ns                    | 0.25              |
| niRBC untreated vs iRBC + DPG                     | -98.84                 | Yes                   | ***                   | <0.001            |
| niRBC untreated vs niRBC + DPG                    | 48.02                  | No                    | ns                    | 0.05              |
| iRBC untreated vs iRBC + DPG                      | 60.43                  | Yes                   | *                     | 0.01              |
| iRBC untreated vs niRBC + DPG                     | 09.62                  | No                    | ns                    | >0.99             |
| iRBC + DPG vs niRBC + DPG                         | -50.81                 | Yes                   | *                     | 0.04              |
| <b>Kruskal-Wallis test Descriptive statistics</b> | <b>niRBC untreated</b> | <b>niRBC + DPG</b>    | <b>iRBC untreated</b> | <b>iRBC + DPG</b> |
| Median                                            | -11.80                 | -12.10                | -12.10                | -12.50            |
| Mean                                              | -11.76                 | -12.23                | -12.09                | -12.52            |
| Std. Deviation                                    | 1.482                  | 1.303                 | 1.220                 | 0.814             |
| Std. Error of Mean                                | 0.1257                 | 0.1089                | 0.1091                | 0.07307           |
| Gaussian peaks $\pm$ Std. Deviation               | -11.82 $\pm$ 0.03      | -12.15 $\pm$ 0.06     | -12.15 $\pm$ 0.04     | -12.43 $\pm$ 0.02 |

Data from three independent experiments. iRBC + DPG – cultures with infected RBCs treated with 2,3-DPG (n=124); iRBC untreated – cultures with infected RBCs un-treated (n=125); niRBC + DPG – non-infected RBCs treated with 2,3-DPG (n=143); niRBC untreated – untreated non-infected RBCs (n=139).
